# Supplementary material
Source: publisher figshare collection journal article supplement (https://acs.figshare.com/ndownloader/files/12882254)
Supplement: Supplementary file 1 [file 12882254]

## **Supporting Information**

**Title:** Polydopamine-assisted Hydroxyapatite and Lactoferrin Multilayer on Titanium for Regulating Bone Balance and Enhancing Antibacterial Property

**Authors:** Tingting Shen, Weihu Yang, Xinkun Shen, Weizhen Chen, Bailong Tao, Xiaoqing Yang, Jianping Yuan, Peng Liu, Kaiyong Cai

**The number of pages:** 5

**The number of figures:** 5

**The number of tables:** 1

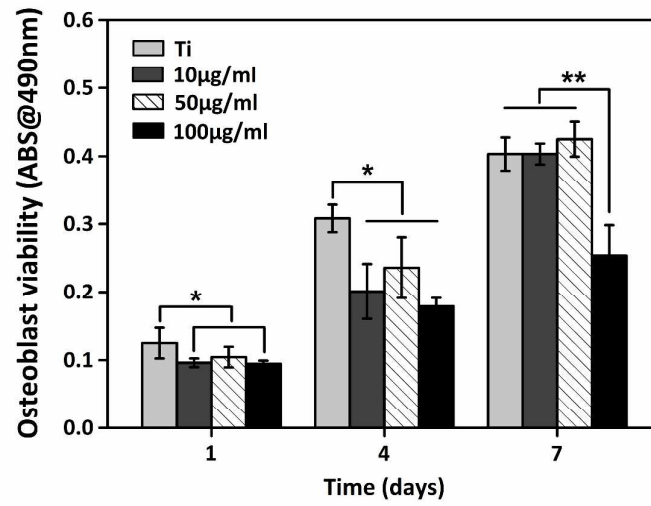

**Figure S1.** Osteoblast activity on Ti and multilayer films with 10, 50 and 100µg/ml lactoferrin after cultured for 1, 4 and 7 d (n = 6), \*p < 0.05, \*\*p < 0.01.

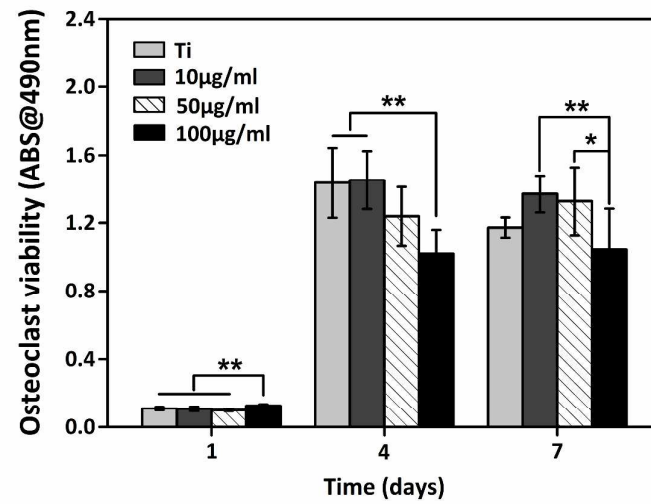

**Figure S2.** Osteoclast activity on Ti and multilayer films with 10, 50 and 100µg/ml lactoferrin after cultured for 1, 4 and 7 d (n = 6), \*p < 0.05, \*\*p < 0.01.

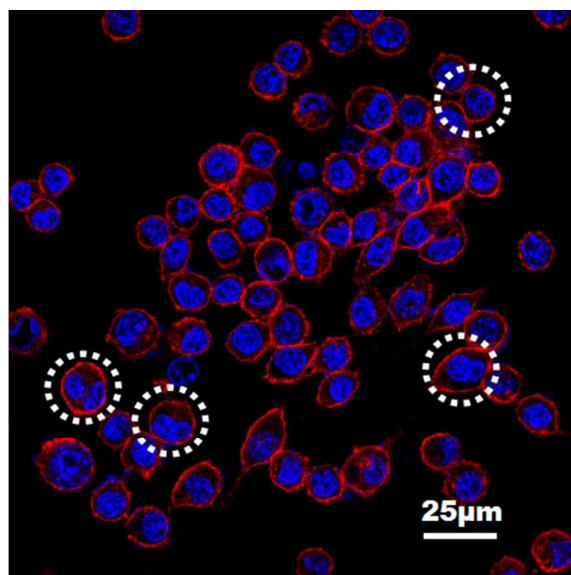

**Figure S3.** Representative fluorescence images of RAW264.7 cells cultured in the presence of RANKL ( $50 \text{ ng mL}^{-1}$ ) and m-CSF ( $20 \text{ ng mL}^{-1}$ ), white circles represent multinucleate osteoclasts.

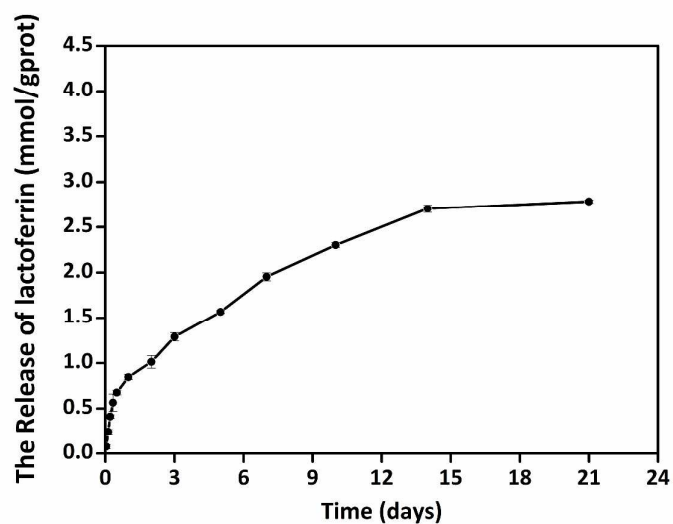

**Figure S4.** LF release from multilayer films in SBF solution (pH 7.4) with immersion for different time intervals.

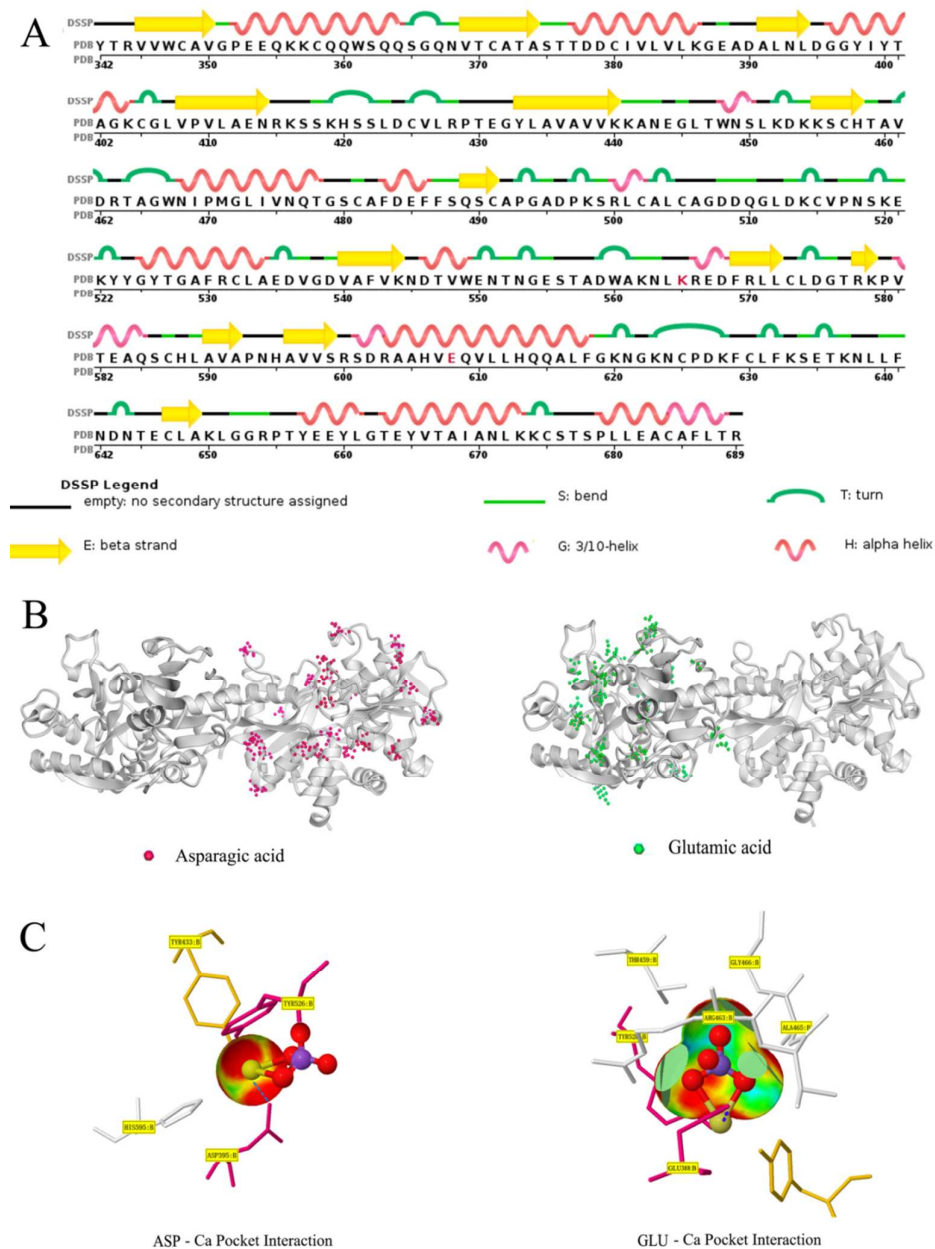

**Figure S5.** Molecular structure of lactoferrin. (a) molecular sequences of C-lobe domain; (b) ASP in N-lobe and GLU in C-lobe domains respectively; (c) interaction between calcium and ASP/or GLU.

**Table S1. Ionic Concentration of Human Blood Plasma and SBF.**

| <b>Ion conc (mM)</b> | <b>Na<sup>+</sup></b> | <b>K<sup>+</sup></b> | <b>Ca<sup>2+</sup></b> | <b>Mg<sup>2+</sup></b> | <b>HCO<sub>3</sub><sup>-</sup></b> | <b>Cl<sup>-</sup></b> | <b>HPO<sub>4</sub><sup>-</sup></b> | <b>SO<sub>4</sub><sup>2-</sup></b> |
|----------------------|-----------------------|----------------------|------------------------|------------------------|------------------------------------|-----------------------|------------------------------------|------------------------------------|
| <b>Blood plasm</b>   | <b>142</b>            | <b>5</b>             | <b>2.5</b>             | <b>1.5</b>             | <b>27</b>                          | <b>103</b>            | <b>1</b>                           | <b>0.5</b>                         |
| <b>SBF</b>           | <b>147</b>            | <b>5</b>             | <b>2.7</b>             | <b>1.6</b>             | <b>6</b>                           | <b>104</b>            | <b>1</b>                           | <b>0.5</b>                         |
